# Supplementary material for: Mouse miRNA-709 directly regulates miRNA-15a/16-1 biogenesis at the posttranscriptional level in the nucleus: evidence for a microRNA hierarchy system
Source: Springer Nature journal article supplement (doi:10.1038/cr.2011.137), 2011-08-23
Supplement: 41422_2012_BFcr2011137_MOESM11_ESM.pdf [file 41422_2012_BFcr2011137_MOESM11_ESM.pdf]

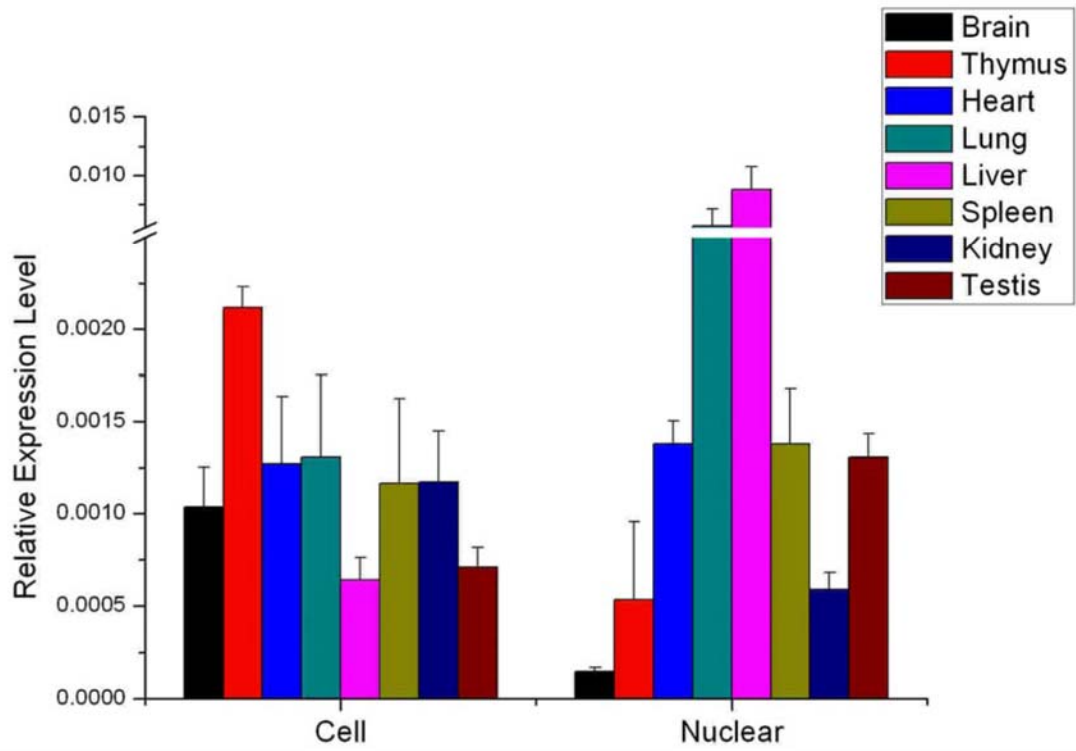

**Supplementary information, Figure S2** The expression profile of miR-709 through different tissues in C57BL/6J mice.
