# Supplementary material for: Mouse miRNA-709 directly regulates miRNA-15a/16-1 biogenesis at the posttranscriptional level in the nucleus: evidence for a microRNA hierarchy system
Source: Springer Nature journal article supplement (doi:10.1038/cr.2011.137), 2011-08-23
Supplement: 41422_2012_BFcr2011137_MOESM13_ESM.pdf [file 41422_2012_BFcr2011137_MOESM13_ESM.pdf]

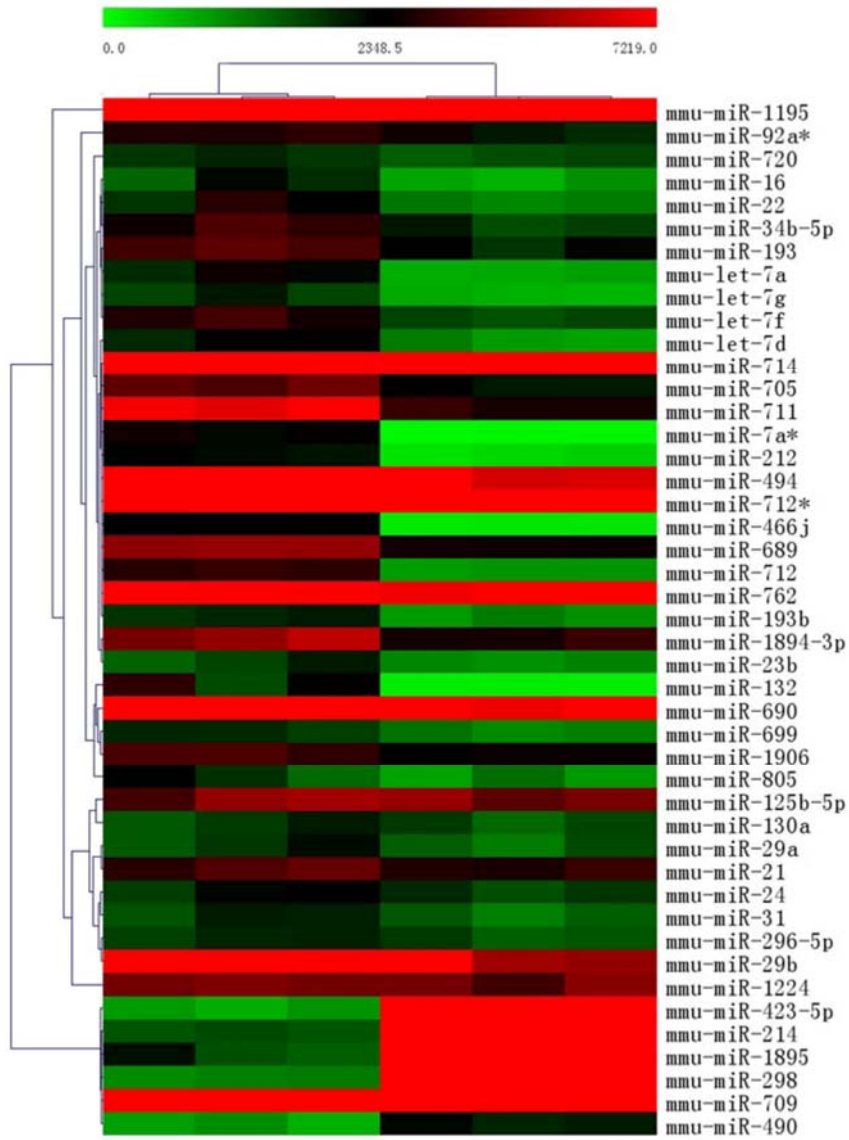

**Supplementary information, Figure S4** Screening for the target miRNAs of miR-709 in the nucleus via microarray assay (only top 44 miRNAs were showed).
