# Supplementary material for: Mouse miRNA-709 directly regulates miRNA-15a/16-1 biogenesis at the posttranscriptional level in the nucleus: evidence for a microRNA hierarchy system
Source: Springer Nature journal article supplement (doi:10.1038/cr.2011.137), 2011-08-23
Supplement: 41422_2012_BFcr2011137_MOESM19_ESM.pdf [file 41422_2012_BFcr2011137_MOESM19_ESM.pdf]

**Supplementary information, T able S1** Liver nucleus miRNA expression profile (top 44) validated via RT-qPCR.

| miRNA      | Cell Nucleus |          |             |          | Nucleus/Cell Ratio |
|------------|--------------|----------|-------------|----------|--------------------|
|            | Average      | SD       | Average     | SD       |                    |
| miR-711    | 5.84714E-05  | 2.06E-05 | 4.75285E-05 | 6.54E-06 | 0.812850236        |
| miR-154    | 0.000108928  | 1.65E-05 | 7.97527E-05 | 1.71E-05 | 0.732160149        |
| miR-370    | 4.98537E-05  | 8.03E-06 | 3.22611E-05 | 5.27E-06 | 0.647116672        |
| miR-24     | 0.089777489  | 0.017138 | 0.055096226 | 0.024866 | 0.613697566        |
| miR-30e    | 0.390440838  | 0.35285  | 0.235291725 | 0.021635 | 0.60263093         |
| miR-709    | 1.220238702  | 0.007436 | 0.735260529 | 0.017056 | 0.602554671        |
| miR-762    | 0.000618314  | 0.000125 | 0.000281435 | 6.7E-05  | 0.455164295        |
| miR-705    | 0.00273123   | 0.000815 | 0.00106665  | 0.000168 | 0.39053814         |
| miR-805    | 0.020618317  | 0.003442 | 0.006734738 | 0.000355 | 0.326638585        |
| miR-181b   | 0.000718381  | 9.22E-05 | 0.000229191 | 4.69E-05 | 0.319038798        |
| miR-185    | 0.001358107  | 8.08E-06 | 0.000408923 | 5.43E-05 | 0.301097597        |
| miR-721    | 0.004354353  | 0.001977 | 0.001288505 | 0.000101 | 0.295911972        |
| miR-188-5p | 8.91826E-07  | 2.82E-07 | 2.51683E-07 | 6.65E-08 | 0.282210727        |
| miR-195    | 0.008821203  | 0.000492 | 0.002474154 | 0.000188 | 0.280478085        |
| miR-1      | 0.002701162  | 0.000286 | 0.000722055 | 2.48E-06 | 0.267312691        |
| miR-196a   | 9.0118E-05   | 3.07E-05 | 2.34344E-05 | 6.49E-06 | 0.260040622        |

|            |             |          |             |          |             |
|------------|-------------|----------|-------------|----------|-------------|
| miR-690    | 1.204341258 | 0.240631 | 0.287084347 | 0.052641 | 0.238374584 |
| miR-19a    | 0.007346301 | 0.001782 | 0.001728339 | 0.000436 | 0.235266548 |
| miR-378    | 0.0162984   | 0.002525 | 0.003697112 | 0.000217 | 0.226838934 |
| miR-19b    | 0.013249455 | 0.002019 | 0.002797514 | 0.000123 | 0.211141826 |
| let7e      | 0.011539154 | 0.00095  | 0.002405413 | 0.000607 | 0.208456591 |
| miR-689    | 0.01729968  | 0.006315 | 0.002938461 | 4.72E-05 | 0.169856369 |
| miR-122    | 0.512158952 | 0.054008 | 0.085834947 | 0.018851 | 0.16759435  |
| miR-101b   | 0.028441133 | 0.008278 | 0.004669919 | 0.001267 | 0.164195955 |
| miR-451    | 0.103927906 | 0.028105 | 0.015321923 | 0.002161 | 0.147428381 |
| miR-126-3p | 0.149029988 | 0.027724 | 0.02013266  | 0.005782 | 0.135091334 |
| miR-143    | 0.023355597 | 0.003013 | 0.003152328 | 0.000753 | 0.13497099  |
| miR-33     | 0.000725784 | 0.000217 | 9.25357E-05 | 3.88E-05 | 0.127497511 |
| miR-27a    | 0.037459662 | 0.014474 | 0.004454759 | 0.000168 | 0.118921502 |
| miR-15b    | 0.002257237 | 0.000123 | 0.000256695 | 7.34E-05 | 0.113720899 |
| miR-145    | 0.008121726 | 0.001446 | 0.000909594 | 4.31E-05 | 0.111995181 |
| miR-27b    | 0.034753954 | 0.007983 | 0.003860441 | 0.000353 | 0.111079193 |
| miR-31     | 0.001832746 | 0.000424 | 0.000199063 | 3.73E-05 | 0.108614403 |
| miR-99a    | 0.005524815 | 0.002019 | 0.000581123 | 0.000148 | 0.105184117 |
| miR-15a    | 0.032238527 | 0.007749 | 0.003317388 | 0.001049 | 0.102901366 |
| miR-23a    | 0.005911221 | 0.000273 | 0.000596972 | 3.01E-05 | 0.100989638 |
| miR-16     | 0.171074184 | 0.030723 | 0.016852942 | 0.005361 | 0.098512481 |

|             |             |          |             |          |             |
|-------------|-------------|----------|-------------|----------|-------------|
| miR-221     | 0.001171777 | 0.000324 | 9.14211E-05 | 1.11E-06 | 0.078019137 |
| miR-125a-5p | 0.007559343 | 0.001576 | 0.000493658 | 0.000124 | 0.065304406 |
| miR-125b-5p | 0.026000741 | 0.008035 | 0.001636224 | 0.000382 | 0.062929916 |
| miR-23b     | 0.01431813  | 0.004442 | 0.000896136 | 0.000221 | 0.062587509 |
| miR-720     | 0.094764244 | 0.041591 | 0.00240494  | 0.000455 | 0.025378141 |
| miR-219     | 1.68661E-05 | 1.28E-05 | 3.35225E-09 | 5.68E-10 | 0.000198756 |
